# Supplementary material for: In situ construction of Bi5O7I/Bi4Ti3O12 heterostructure composites with plentiful phase interfaces for the boosted selective oxidation of benzylic alcohols under visible light
Source: Royal Society of Chemistry journal article supplement (doi:10.1039/d1tc03125b), 2021-01-01
Supplement: d1tc03125b1.pdf [file d1tc03125b1.pdf]

## Supporting Information

### **In situ construction of Bi<sub>5</sub>O<sub>7</sub>I/Bi<sub>4</sub>Ti<sub>3</sub>O<sub>12</sub> heterostructure composite with plentiful phase interfaces for boosted selective oxidation of benzylic alcohols under visible light**

Jingchao Wang<sup>a</sup>, Siyi Li<sup>a</sup>, Kunlong Yang<sup>a</sup>, Tianyong Zhang<sup>a,b,c\*</sup>, Shuang Jiang<sup>a\*</sup>,  
Xianggao Li<sup>a,b,c</sup>, Bin Li<sup>a,c\*</sup>

[a] Tianjin Key Laboratory of Applied Catalysis Science and Technology, School of Chemical Engineering and Technology, Tianjin University, Tianjin 300354 (P.R. China)

[b] Collaborative Innovation Center of Chemical Science and Engineering (Tianjin), Tianjin 300072, China

[c] Tianjin Engineering Research Center of Functional Fine Chemicals, Tianjin 300354 (P.R. China)

\*Corresponding author. E-mail address: libin@tju.edu.cn (Bin Li), tyzhang@tju.edu.cn (Tianyong Zhang), shuangjiang@tju.edu.cn (Shuang Jiang)

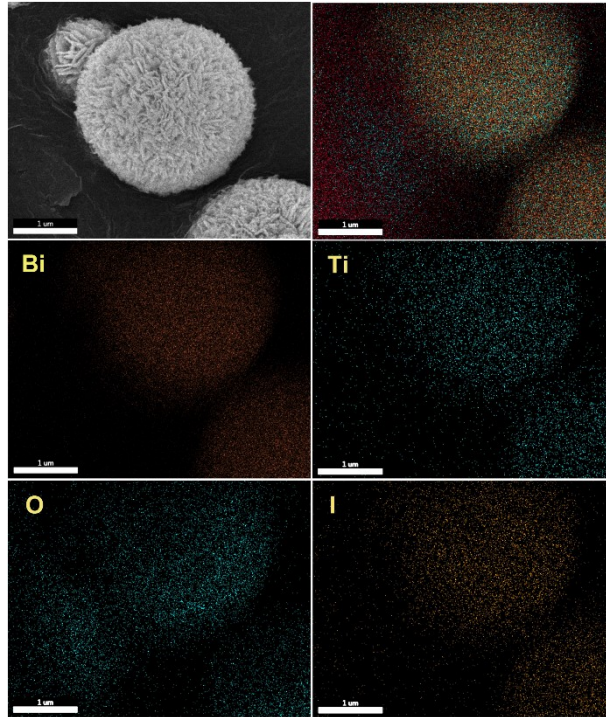

**Fig. S1** SEM/EDS mapping of BOI/BTO-1.5.

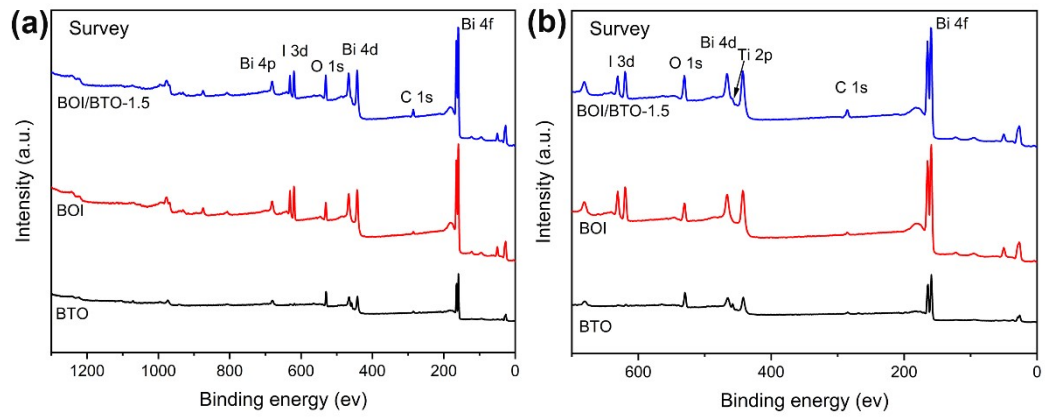

**Fig. S2** (a) The survey XPS spectra of BOI, BTO and BOI/BTO-1.5; (b) the survey XPS spectra enlarged view of BOI, BTO and BOI/BTO-1.5.

**Table S1** Physicochemical parameters of different samples

| Sample      | Surface area (m <sup>2</sup> . g <sup>-1</sup> ) | Pore volume (cm <sup>3</sup> .g <sup>-1</sup> ) | Pore diameter (nm) |
|-------------|--------------------------------------------------|-------------------------------------------------|--------------------|
| BOI         | 3.15                                             | 0.03                                            | 90.42              |
| BTO         | 2.25                                             | 0.01                                            | 69.34              |
| BOI/BTO-1   | 19.95                                            | 0.17                                            | 32.72              |
| BOI/BTO-1.5 | 25.63                                            | 0.18                                            | 24.83              |
| BOI/BTO-2   | 25.07                                            | 0.20                                            | 27.78              |
| BOI/BTO-3   | 23.86                                            | 0.25                                            | 47.20              |

**Table S2** Photocatalytic activity for the oxidation of 4-MBA over BOI/BTO-1.5 with different amount of catalyst<sup>[a]</sup>

| Entry | Catalyst amount (mg) | 4-MBA/H <sub>2</sub> O <sub>2</sub> (molar ratio) | Time (h) | hν <sup>[b]</sup> | Conversion (%) | Selectivity (%) |
|-------|----------------------|---------------------------------------------------|----------|-------------------|----------------|-----------------|
| 1     | 5                    | 1:2                                               | 8        | +                 | 14.6           | 72.3            |
| 2     | 20                   | 1:2                                               | 8        | +                 | 20.1           | 88.3            |
| 3     | 50                   | 1:2                                               | 8        | +                 | 22.8           | 90.6            |
| 4     | 80                   | 1:2                                               | 8        | +                 | 23.0           | 80.0            |
| 5     | 100                  | 1:2                                               | 8        | +                 | 37.5           | 29.4            |

<sup>[a]</sup> Reaction conditions: catalyst (BOI/BTO-1.5), 4-MBA (0.2 mmol), DMF (5 mL), H<sub>2</sub>O<sub>2</sub> (0.4 mmol), in the air<sup>[b]</sup> Visible light (λ > 420 nm)**Table S3** Photocatalytic activity for the oxidation of 4-MBA over BOI/BTO-1.5 with different molar ratios of 4-MBA/H<sub>2</sub>O<sub>2</sub><sup>[a]</sup>

| Entry | Catalyst    | 4-MBA/H <sub>2</sub> O <sub>2</sub> (molar ratio) | Time (h) | hν <sup>[b]</sup> | Conversion (%) | Selectivity (%) |
|-------|-------------|---------------------------------------------------|----------|-------------------|----------------|-----------------|
| 1     | BOT/BTO-1.5 | 1:1                                               | 8        | +                 | 20.2           | 92.4            |
| 2     | BOT/BTO-1.5 | 1:1.5                                             | 8        | +                 | 21.4           | 91.6            |
| 3     | BOT/BTO-1.5 | 1:2                                               | 8        | +                 | 22.8           | 90.6            |
| 4     | BOT/BTO-1.5 | 1:2.5                                             | 8        | +                 | 23.7           | 65.0            |
| 5     | BOT/BTO-1.5 | 1:3                                               | 8        | +                 | 26.3           | 48.7            |
| 6     | BOT/BTO-1.5 | 1:4                                               | 8        | +                 | 29.4           | 43.6            |

<sup>[a]</sup> Reaction conditions: catalyst (BOI/BTO-1.5, 50 mg), 4-MBA (0.2 mmol), DMF (5 mL), in the air<sup>[b]</sup> Visible light (λ > 420 nm)

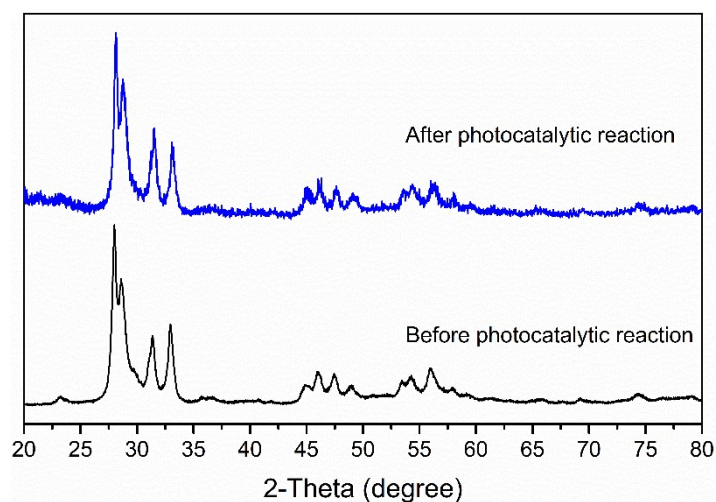

**Fig. S3** XRD patterns of the fresh and four cycles used BOI/BTO-1.5.

**Table S4** BiOI-based photocatalysts for photocatalytic oxidation of benzylic alcohols

| Catalyst                                         | Operating condition                                             | Conversion (%) | Selectivity (%) | Reference |
|--------------------------------------------------|-----------------------------------------------------------------|----------------|-----------------|-----------|
| Bi <sub>2</sub> MoO <sub>6</sub> -Vo-poor        | Visible-light irradiation                                       | 7.1            | 91.0            | 77        |
| Bi <sub>2</sub> MoO <sub>6</sub> -Vo-rich        | 4 h, O <sub>2</sub>                                             | 38.2           | >99             |           |
| BiOCl/Bi <sub>2</sub> WO <sub>6</sub>            | Visible-light irradiation<br>4 h, O <sub>2</sub>                | 22.5           | -               | 62        |
| BiOBr/Bi <sub>2</sub> WO <sub>6</sub>            |                                                                 | 30.9           | -               |           |
| BiOI/Bi <sub>2</sub> WO <sub>6</sub>             | Visible-light irradiation<br>1 h, O <sub>2</sub>                | 13.0           | -               | 63        |
| 0.3 wt% Pt/Bi <sub>2</sub> MoO <sub>6</sub>      |                                                                 | 36.0           | >99             |           |
| Bi <sub>12</sub> O <sub>17</sub> Cl <sub>2</sub> | Visible-light irradiation<br>8 h, O <sub>2</sub> , 50 °C        | 44.0           | >99             | 64        |
| BOI/BTO                                          | Visible-light irradiation<br>8 h, H <sub>2</sub> O <sub>2</sub> | 20.2           | 92              | Our work  |
